# Supplementary material for: Fusions involving BCOR and CREBBP are rare events in infiltrating glioma
Source: PubMed Central journal article supplement (PMC7271411; doi:10.1186/s40478-020-00951-4), 2020-06-03
Supplement: 40478_2020_951_MOESM1_ESM.pdf [file 40478_2020_951_MOESM1_ESM.pdf]

**Supplementary Table S1. Genes interrogated by Oncomine panel**

| 86 genes for the detection of hotspot mutations |        |        |        |        |         |        |
|-------------------------------------------------|--------|--------|--------|--------|---------|--------|
| AKT1                                            | AKT2   | AKT3   | ALK    | AR     | ARAF    | AXL    |
| BRAF                                            | BTK    | CBL    | CCND1  | CDK4   | CDK6    | CHEK2  |
| CSF1R                                           | CTNNB1 | DDR2   | EGFR   | ERB83  | ERBB2   | ERBB4  |
| ERCC2                                           | ESR1   | EZH2   | FGFR1  | FGFR2  | FGFR3   | FGFR4  |
| FLT3                                            | FOXL2  | GATA2  | GNA11  | GNAQ   | GNAS    | H3F3A  |
| HIST1H3B                                        | HNF1A  | HRAS   | IDH1   | IDH2   | JAK1    | JAK2   |
| JAK3                                            | KIT    | KNSTRN | KDR    | KRAS   | MAGOH   | MAP2K1 |
| MAP2K2                                          | MAP2K4 | MAPK1  | MAX    | MDM4   | MED12   | MET    |
| MTOR                                            | MYC    | MYCN   | MYD88  | NFE2L2 | NRAS    | NTRK1  |
| NTRK2                                           | PDGFRA | PDGFRB | PIK3CA | PIK3CB | PPP2R1A | PTPN11 |
| RAC1                                            | RAF1   | RET    | RHEB   | RHOA   | ROS1    | SF3B1  |
| SMAD4                                           | SMO    | SPOP   | SRC    | STAT3  | TERT    | TOP1   |
| U2AF1                                           | XPO1   |        |        |        |         |        |

| 48 genes with full coding exonic regions for the detection of mutations |         |        |        |        |        |        |
|-------------------------------------------------------------------------|---------|--------|--------|--------|--------|--------|
| ARID1A                                                                  | ATM     | ATR    | ATRX   | BAP1   | BRCA1  | BRCA2  |
| CDK12                                                                   | CDKN1B  | CDKN2A | CDKN2B | CHEK1  | CREBBP | FANCA  |
| FANCD2                                                                  | FANCI   | FBXW7  | MLH1   | MRE11A | MSH2   | MSH6   |
| NBN                                                                     | NF1     | NF2    | NOTCH1 | NOTCH2 | NOTCH3 | PALB2  |
| PIK3R1                                                                  | PMS2    | POLE   | PTCH1  | PTEN   | RAD51  | RAD51B |
| RAD51C                                                                  | RAD51D  | RAD50  | RB1    | RNF43  | SETD2  | SLX4   |
| SMARCA4                                                                 | SMARCB1 | STK11  | TP53   | TSC1   | TSC2   |        |

| 47 genes for the detection of copy number alterations |        |       |        |        |        |        |
|-------------------------------------------------------|--------|-------|--------|--------|--------|--------|
| AKT1                                                  | AKT2   | AKT3  | ALK    | AR     | AXL    | BRAF   |
| CCND1                                                 | CCND2  | CCND3 | CCNE1  | CDK2   | CDK4   | CDK6   |
| CDKN2A                                                | CDKN2B | EGFR  | ERBB2  | ESR1   | FGF19  | FGF3   |
| FGFR1                                                 | FGFR2  | FGFR3 | FGFR4  | FLT3   | IGF1R  | KIT    |
| KRAS                                                  | MDM2   | MDM4  | MET    | MYC    | MYCL   | MYCN   |
| NTRK1                                                 | NTRK2  | NTRK3 | PDGFRA | PDGFRB | PIK3CA | PIK3CB |
| PPARG                                                 | RICTOR | TERT  | TSC1   | TSC2   |        |        |

| 51 genes for the detection of gene fusions involving intergenic and intragenic regions |        |        |       |        |        |       |
|----------------------------------------------------------------------------------------|--------|--------|-------|--------|--------|-------|
| AKT2                                                                                   | ALK    | AR     | AXL   | BRAF   | BRCA1  | BRCA2 |
| CDKN2A                                                                                 | EGFR   | ERB84  | ERBB2 | ERG    | ESR1   | ETV1  |
| ETV4                                                                                   | ETVS   | FGFR1  | FGFR2 | FGFR3  | FGR    | FLT3  |
| JAK2                                                                                   | KRAS   | MDM4   | MET   | MYB    | MYBL1  | NF1   |
| NOTCH1                                                                                 | NOTCH4 | NRG1   | NTRK1 | NTRK2  | NTRK3  | NUTM1 |
| PDGFRA                                                                                 | PDGFRB | PIK3CA | PPARG | PRKACA | PRKACB | PTEN  |
| RAD51B                                                                                 | RAF1   | RB1    | RELA  | RET    | ROS1   | RSPO2 |
| RSPO3                                                                                  | TERT   |        |       |        |        |       |
