# Supplementary material for: Fusions involving BCOR and CREBBP are rare events in infiltrating glioma
Source: PubMed Central journal article supplement (PMC7271411; doi:10.1186/s40478-020-00951-4), 2020-06-03
Supplement: 40478_2020_951_MOESM2_ESM.pdf [file 40478_2020_951_MOESM2_ESM.pdf]

# Supplementary Figure 1

BCOR (C10 AB)

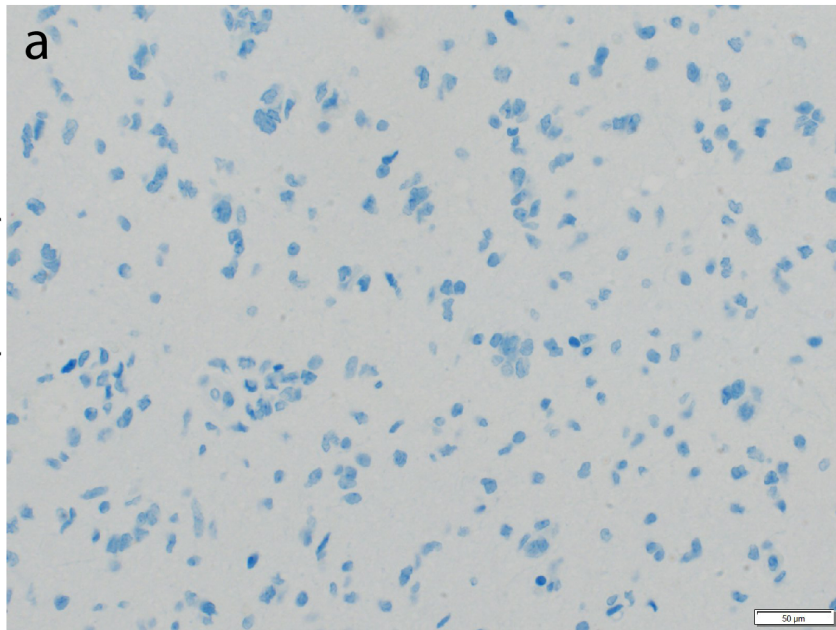

INDEX CASE - INFILTRATING GLIOMA

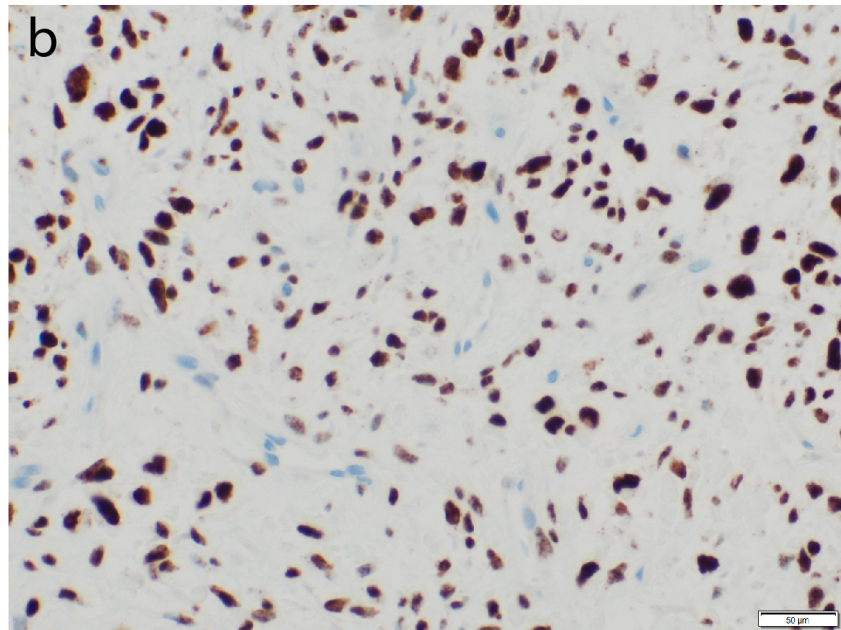

EWING-LIKE SARCOMA WITH BCOR FUSION
