# Supplementary material for: Fusions involving BCOR and CREBBP are rare events in infiltrating glioma
Source: PubMed Central journal article supplement (PMC7271411; doi:10.1186/s40478-020-00951-4), 2020-06-03

# Supplementary Figure 2

## a Index case

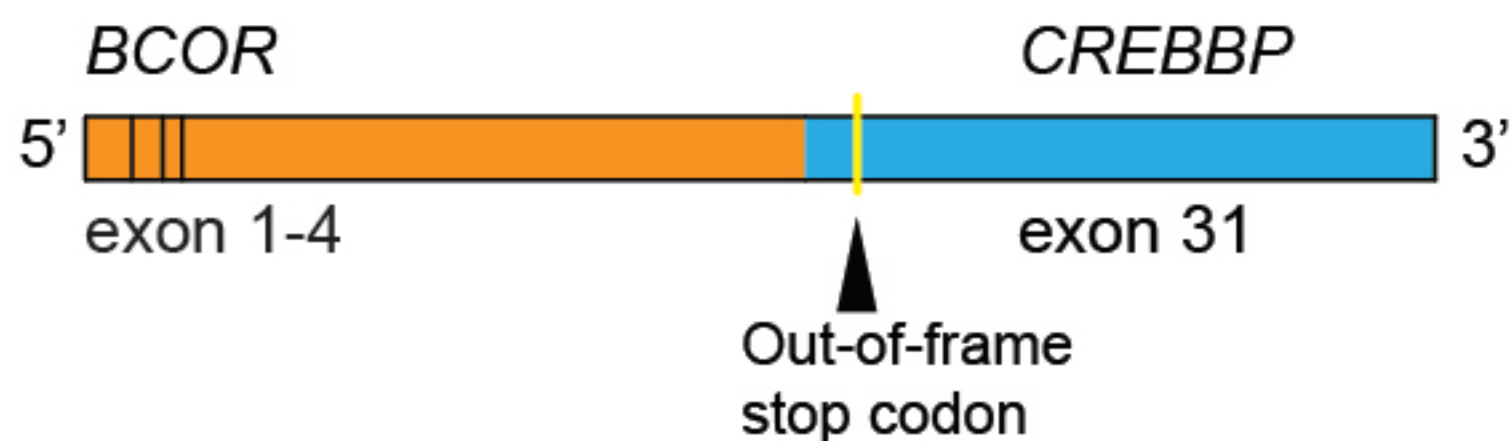

## b Endometrial stromal sarcoma (Lin, *et al.*)

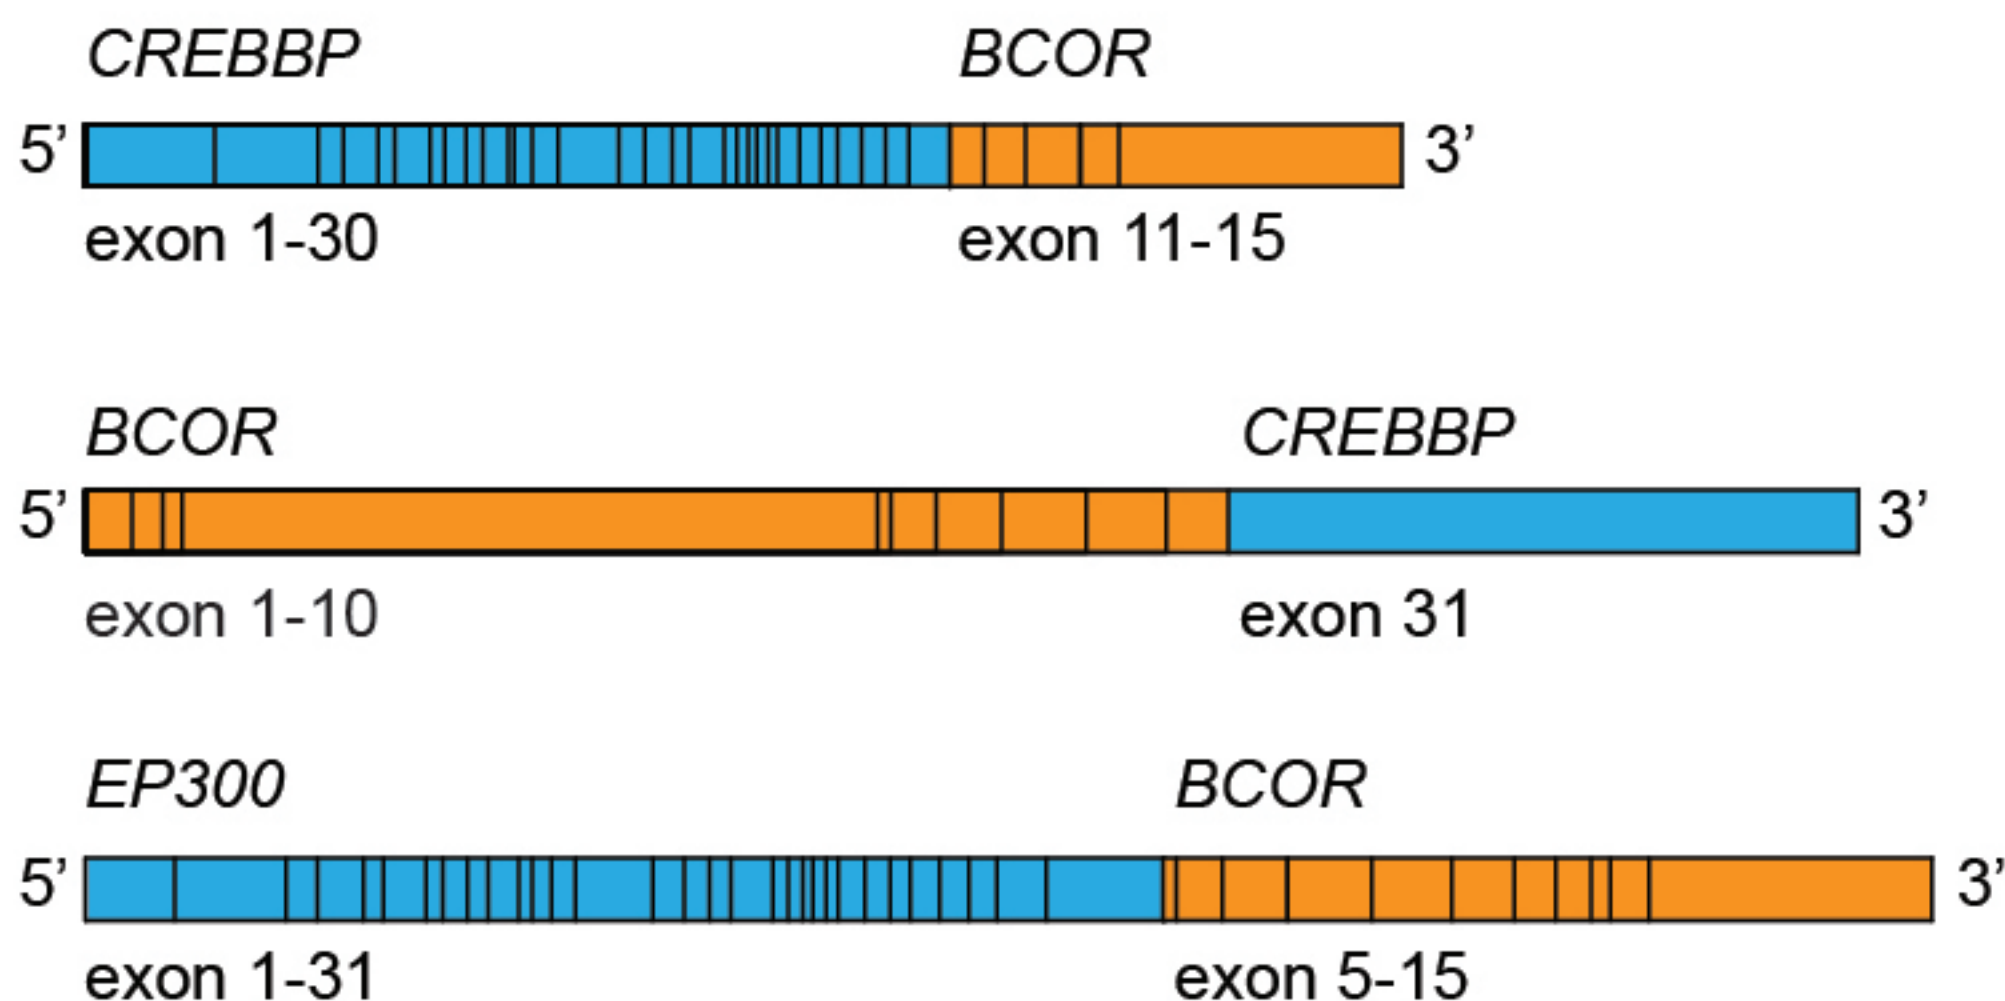

## c Pediatric glioma (Torre, *et al.*)

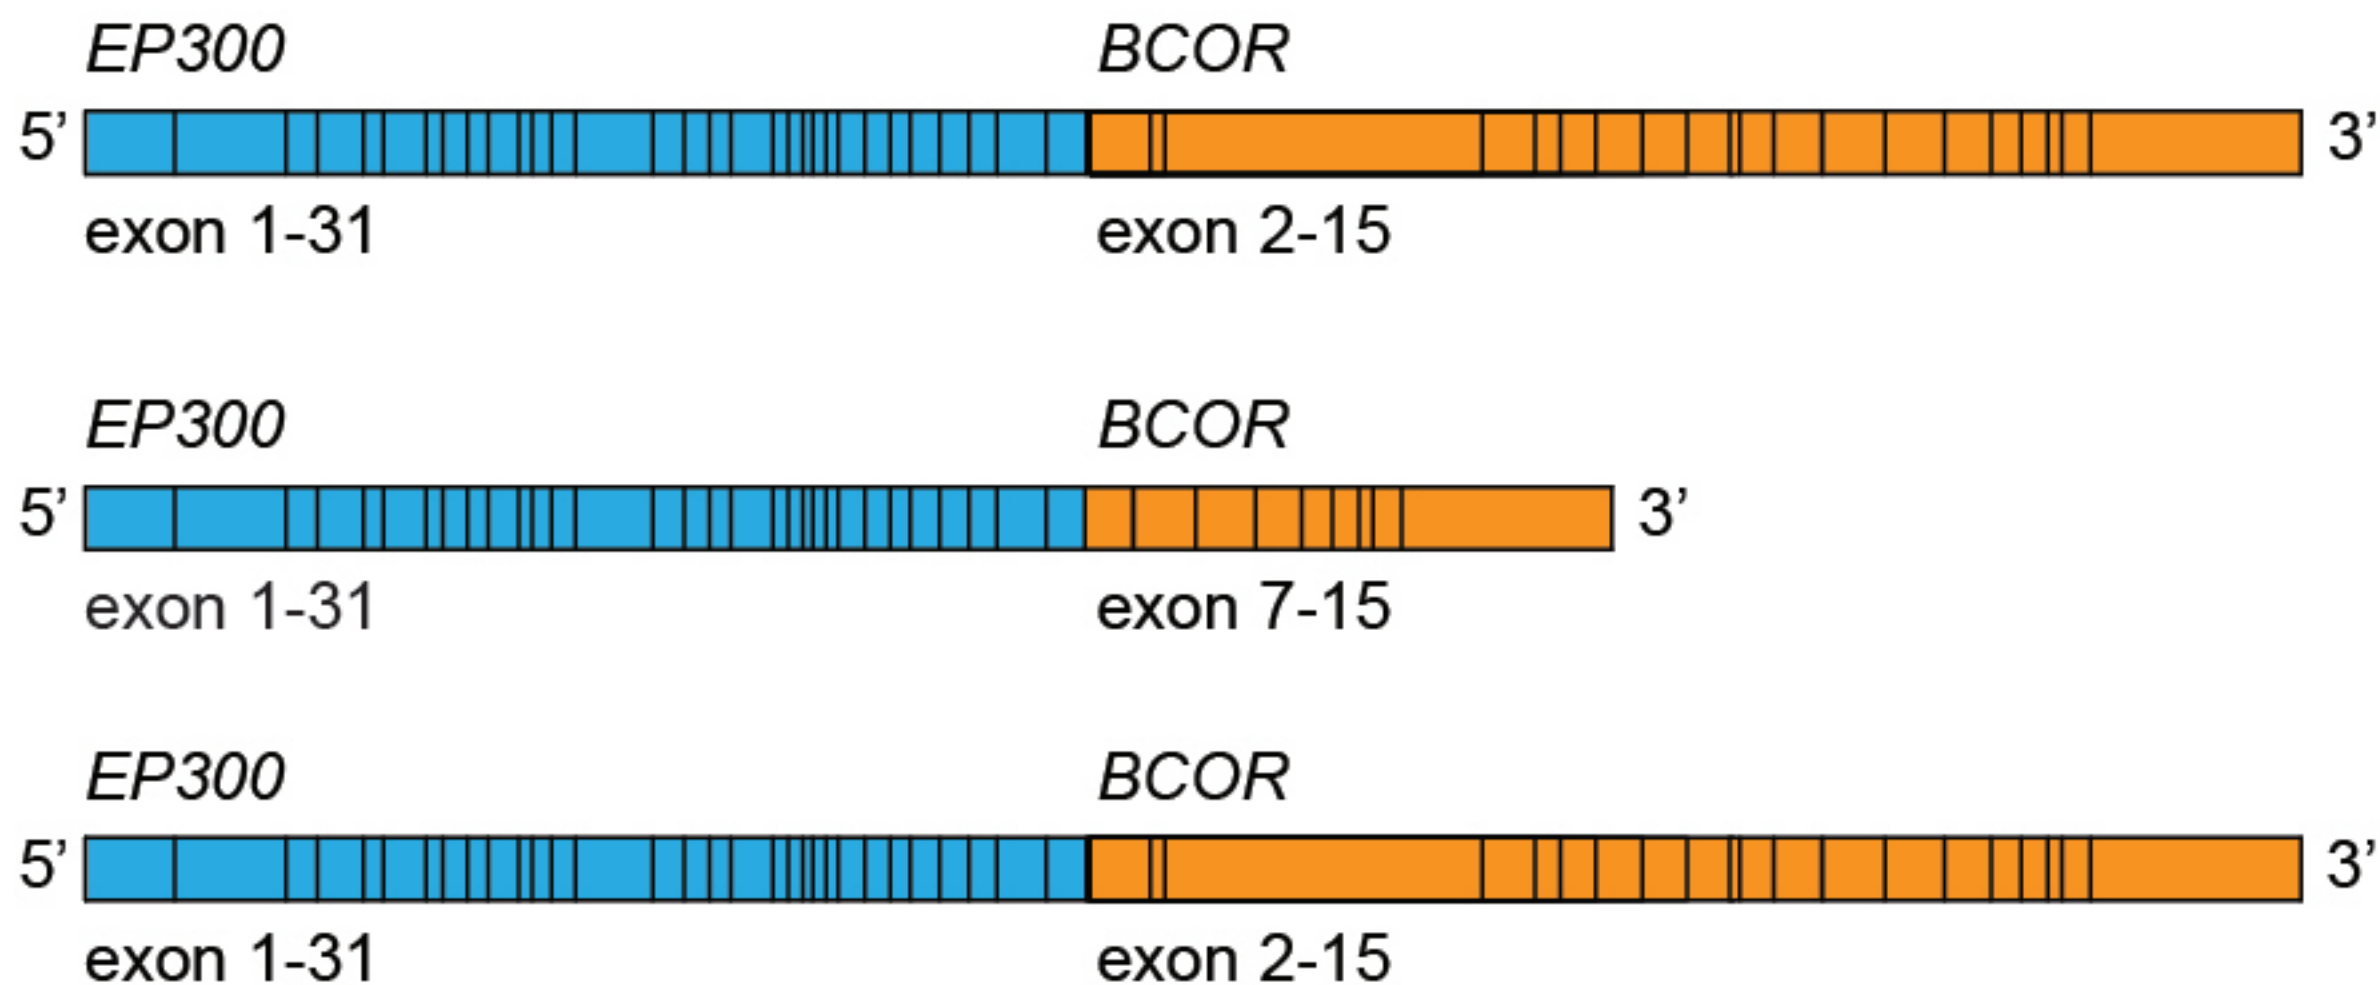

Supplement: 40478_2020_951_MOESM3_ESM.pdf [file 40478_2020_951_MOESM3_ESM.pdf]
