# Supplementary material for: Fusions involving BCOR and CREBBP are rare events in infiltrating glioma
Source: PubMed Central journal article supplement (PMC7271411; doi:10.1186/s40478-020-00951-4), 2020-06-03
Supplement: 40478_2020_951_MOESM4_ESM.pdf [file 40478_2020_951_MOESM4_ESM.pdf]

# Supplementary Figure 3

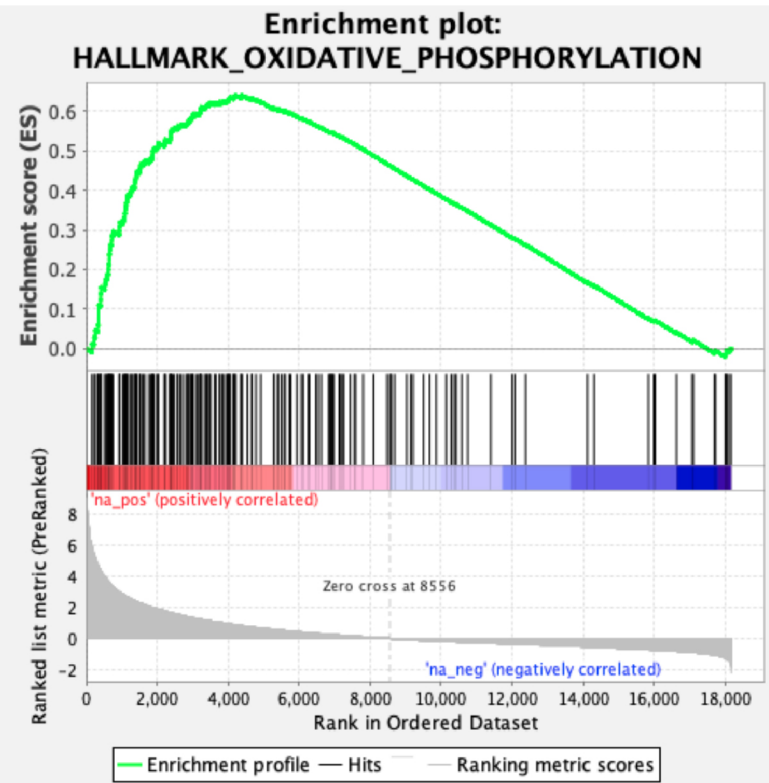

| RANK IN GENE SET | GENE   | OVERALL RANK |
|------------------|--------|--------------|
| 1                | BDH2   | 166          |
| 2                | COX7C  | 224          |
| 3                | PHB2   | 260          |
| 4                | NDUFS4 | 333          |
| 5                | NDUFC1 | 350          |
| 6                | LDHB   | 351          |
| 7                | TIMM9  | 352          |
| 8                | NDUFB8 | 409          |
| 9                | UQCRH  | 412          |
| 10               | OAT    | 423          |

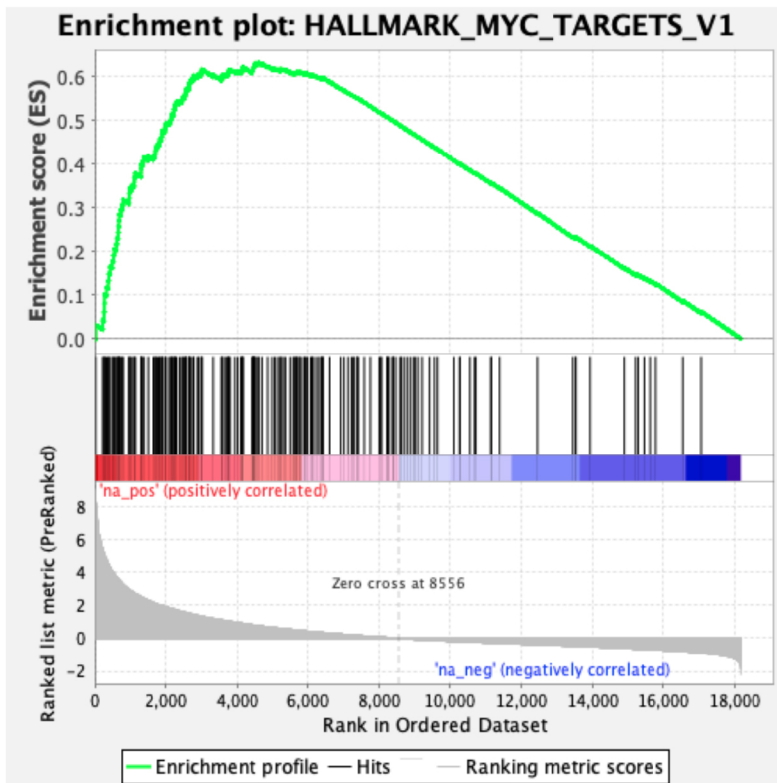

| RANK IN GENE SET | GENE    | OVERALL RANK |
|------------------|---------|--------------|
| 1                | RPL34   | 30           |
| 2                | HNRNPA3 | 221          |
| 3                | PHB2    | 260          |
| 4                | RPL6    | 270          |
| 5                | RPL22   | 274          |
| 6                | RPS3    | 330          |
| 7                | RPS6    | 377          |
| 8                | HDDC2   | 395          |
| 9                | U2AF1   | 432          |
| 10               | SNRPD2  | 494          |
